# Supplementary material
Source: PubMed Central journal article supplement (PMC4879053)
Supplement: NIHMS774867-supplement-Supplemental_Digital_Content.pdf [file NIHMS774867-supplement-Supplemental_Digital_Content.pdf]

**Appendix 1. Maternal Characteristics Among Women With One or More Births During Coronary Artery Risk Development in Young Adults Study Follow-up, by Metabolic Syndrome Incidence Across Follow-up<sup>a</sup>**

|                                      | <b>No Metabolic Syndrome (n=890)</b> | <b>Incident Metabolic Syndrome (n=315)</b> | <b>p-value<sup>b</sup></b> |
|--------------------------------------|--------------------------------------|--------------------------------------------|----------------------------|
| Age at baseline, years               | 23.6 ± 3.7                           | 23.8 ± 3.7                                 | 0.284                      |
| Black race (n, %)                    | 393 (44.2%)                          | 204 (64.8%)                                | <.001                      |
| High school education or less (n, %) | 285 (32.0%)                          | 145 (46.0%)                                | 0.005                      |
| Parous at baseline (n, %)            | 251 (28.2%)                          | 128 (40.6%)                                | <.001                      |
| Baseline BMI, kg/m <sup>2</sup>      | 21.6 ± 3.7                           | 25.7 ± 5.7                                 | <.001                      |
| Smoking at baseline (n, %)           | 200 (22.5%)                          | 99 (31.4%)                                 | <.001                      |
| Physical Activity                    | 362.4 ± 260                          | 314.2 ± 237                                | 0.0039                     |
| Post-Baseline Births                 | 1.7 ± 0.9                            | 1.5 ± 0.8                                  | 0.0031                     |
| Hypertension (n, %)                  |                                      |                                            |                            |
| During pregnancy (ever)              | 80 (9.0%)                            | 57 (18.1%)                                 | <.001                      |
| Before index pregnancy               | 15 (1.7%)                            | 11 (3.5%)                                  | 0.057                      |
| After index pregnancy                | 173 (19.4%)                          | 217 (68.9%)                                | <.001                      |
| Gestational diabetes (n, %)          | 81 (9.1%)                            | 53 (16.8%)                                 | <.001                      |

Catov JM, Althouse AD, Lewis CE, Harville EW, Gunderson EP. Preterm delivery and metabolic syndrome in patients followed from prepregnancy through 25 years later. *Obstet Gynecol* 2016;127.

The authors provided this information as a supplement to their article.

|                                            |             |             |        |
|--------------------------------------------|-------------|-------------|--------|
| Age at index delivery, years               | 30.1 ± 5.0  | 29.1 ± 4.5  | 0.0027 |
| Years from baseline to first delivery      | 6.5 ± 4.3   | 5.2 ± 3.5   | <.0001 |
| Years from last birth to last CARDIA visit | 13.5 ± 6.8  | 16.2 ± 6.1  | <.0001 |
| <u>Metabolic syndrome components</u>       |             |             |        |
| <u>(Baseline)</u>                          |             |             |        |
| Waist circumference (cm)                   | 69.6 ± 7.4  | 78.4 ± 11.8 | <.0001 |
| Blood pressure (mmHg)                      |             |             |        |
| Systolic                                   | 104.3 ± 8.7 | 107.9 ± 8.8 | <.0001 |
| Diastolic                                  | 65.0 ± 8.3  | 67.2 ± 9.0  | <.0001 |
| Triglycerides (mg/dl) <sup>c</sup>         | 60.7 ± 26.1 | 73.9 ± 38.3 | <.0001 |
| HDL-cholesterol (mg/dl) <sup>c</sup>       | 57.6 ± 12.4 | 52.1 ± 12.0 | <.0001 |
| Glucose (mg/dl) <sup>c</sup>               | 78.8 ± 7.4  | 80.2 ± 8.1  | 0.0053 |
| HOMA-IR at baseline <sup>c</sup>           | 1.9 ± 1.4   | 2.7 ± 1.9   | <.0001 |

<sup>a</sup>Continuous variables displayed as mean ± SD; categorical variables shown as n (%)

<sup>b</sup>P-value from t-test (continuous) or chi squared (categorical)

<sup>c</sup> Measured in samples collected following ≥ 8 fasting

Catov JM, Althouse AD, Lewis CE, Harville EW, Gunderson EP. Preterm delivery and metabolic syndrome in patients followed from prepregnancy through 25 years later. *Obstet Gynecol* 2016;127.

The authors provided this information as a supplement to their article.

**Appendix 2. Relative Hazard Ratios (95% Confidence Intervals) of Incident Metabolic Syndrome According to Preterm Birth Status, White Women (n=608)**

| Model |                                                                               | Preterm<br>Hazard ratio (HR) <sup>a</sup> | 95% CI     |
|-------|-------------------------------------------------------------------------------|-------------------------------------------|------------|
| 1     | Unadjusted                                                                    | 4.60                                      | 4.21, 5.04 |
| 2     | Adjusted for baseline metabolic syndrome components <sup>b</sup>              | 1.69                                      | 1.22, 2.35 |
| 3     | Model 2 + age and education                                                   | 1.59                                      | 1.14, 2.22 |
| 4     | Model 3 + baseline BMI                                                        | 1.55                                      | 1.11, 2.16 |
| 5     | Model 4 + parous at baseline, smoking at baseline, and time varying parity    | 1.66                                      | 1.11, 2.48 |
| 6     | Model 5 + time varying exposure to GDM or hypertensive disorders of pregnancy | 1.72                                      | 1.15, 2.58 |
| 7     | Model 6 + time varying weight gain                                            | 1.66                                      | 1.09, 2.52 |

<sup>a</sup>Referent for all models is women with term births.

<sup>b</sup>Baseline MetS components include blood pressure, waist circumference, triglycerides, glucose, HDL-cholesterol

Catov JM, Althouse AD, Lewis CE, Harville EW, Gunderson EP. Preterm delivery and metabolic syndrome in patients followed from prepregnancy through 25 years later. *Obstet Gynecol* 2016;127.

The authors provided this information as a supplement to their article.

**Appendix 3. Relative Hazard Ratios (95% Confidence Intervals) of Incident Metabolic Syndrome According to Preterm Birth Status, Black Women (n=597)**

| Model |                                                                               | Preterm<br>Hazard ratio (HR) <sup>a</sup> | 95% CI     |
|-------|-------------------------------------------------------------------------------|-------------------------------------------|------------|
| 1     | Unadjusted                                                                    | 2.01                                      | 1.86, 2.18 |
| 2     | Adjusted for baseline metabolic syndrome components <sup>b</sup>              | 1.40                                      | 1.13, 1.74 |
| 3     | Model 2 + age and education                                                   | 1.37                                      | 1.10, 1.70 |
| 4     | Model 3 + baseline BMI                                                        | 1.36                                      | 1.09, 1.69 |
| 5     | Model 4 + parous at baseline, smoking at baseline, and time varying parity    | 1.63                                      | 1.25, 2.11 |
| 6     | Model 5 + time varying exposure to GDM or hypertensive disorders of pregnancy | 1.54                                      | 1.19, 2.01 |
| 7     | Model 6 + time varying weight gain                                            | 1.53                                      | 1.15, 2.01 |

<sup>a</sup>Referent for all models is women with term births.

<sup>b</sup>Baseline MetS components include blood pressure, waist circumference, triglycerides, glucose, HDL-cholesterol

Catov JM, Althouse AD, Lewis CE, Harville EW, Gunderson EP. Preterm delivery and metabolic syndrome in patients followed from prepregnancy through 25 years later. *Obstet Gynecol* 2016;127.

The authors provided this information as a supplement to their article.
